# Supplementary material for: Evaluating the halogen bonding strength of a iodoloisoxazolium(III) salt
Source: Beilstein J Org Chem. 2024 Sep 23;20:2401–7. doi: 10.3762/bjoc.20.204 (PMC11443664; doi:10.3762/bjoc.20.204)
Supplement: File 3 — Crystallographic data. [file Beilstein_J_Org_Chem-20-2401-s003.xlsx]

## Sheet: Tabelle1
CCDC No	2362114					Table 2. Atomic coordinates and equivalent isotropic displacement parameters [Å2] for oc1h-dlr-cat-012-c						Table 3. Anisotropic displacement parameters [Å2] for oc1h-dlr-cat-012-c
Compound	oc1h-dlr-cat-012-c						x	y	z	U(eq)			U11	U22	U33	U23	U13	U12
Empirical formula	C16 H11 Br I N O					I(1)	0.73431(3)	0.15090(2)	0.50019(2)	0.02363(11)		I(1)	0.02519(15)	0.02235(16)	0.02405(16)	-0.00014(7)	0.00595(10)	0.00260(7)
Formula weight [g/mol]	440.07					O(1)	0.1352(5)	0.3653(2)	0.45188(11)	0.0320(6)		O(1)	0.0323(14)	0.0304(13)	0.0333(14)	0.0020(10)	0.0038(11)	0.0061(10)
Crystal system	Monoclinic					N(1)	0.0936(5)	0.2955(3)	0.40203(12)	0.0341(7)		N(1)	0.0340(16)	0.0391(17)	0.0293(15)	0.0040(13)	0.0027(12)	0.0027(14)
Space group	P21/n (14)					C(1)	0.6463(6)	0.2935(3)	0.55510(14)	0.0266(7)		C(1)	0.0294(17)	0.0195(16)	0.0324(17)	-0.0011(13)	0.0097(14)	0.0026(14)
Lattice parameters [Å]						C(2)	0.7697(7)	0.3165(3)	0.60563(14)	0.0309(7)		C(2)	0.0325(18)	0.0335(18)	0.0275(17)	-0.0012(14)	0.0068(15)	0.0032(15)
a	5.47070(10)					C(3)	0.6784(7)	0.4093(3)	0.63785(16)	0.0354(8)		C(3)	0.039(2)	0.037(2)	0.0305(18)	-0.0050(15)	0.0048(16)	0.0016(16)
b	10.91390(10)					C(4)	0.4695(7)	0.4750(3)	0.61845(16)	0.0362(8)		C(4)	0.045(2)	0.0273(18)	0.038(2)	-0.0063(15)	0.0156(16)	0.0022(16)
c	24.3668(3)					C(5)	0.3485(7)	0.4509(3)	0.56747(15)	0.0308(7)		C(5)	0.0331(18)	0.0269(18)	0.0336(18)	0.0018(14)	0.0095(15)	0.0058(14)
a	90					C(6)	0.4356(7)	0.3590(3)	0.53448(16)	0.0279(8)		C(6)	0.0289(19)	0.0235(17)	0.0324(19)	0.0051(13)	0.0084(16)	0.0001(14)
b	95.6010(10)					C(7)	0.3339(6)	0.3190(3)	0.48136(14)	0.0267(7)		C(7)	0.0261(16)	0.0242(16)	0.0302(17)	0.0059(13)	0.0049(14)	-0.0009(14)
g	90					C(8)	0.4273(6)	0.2246(3)	0.45363(13)	0.0266(7)		C(8)	0.0275(16)	0.0266(16)	0.0266(16)	0.0033(13)	0.0064(13)	-0.0003(14)
Density [g/cm3]	2.019					C(9)	0.2693(6)	0.2133(3)	0.40390(13)	0.0269(7)		C(9)	0.0258(16)	0.0300(18)	0.0260(16)	0.0066(14)	0.0080(13)	-0.0007(14)
Crystal size [mm3]	0.159 x 0.137 x 0.063					C(10)	0.2765(7)	0.1256(3)	0.35648(15)	0.0322(8)		C(10)	0.0331(19)	0.0337(18)	0.0293(18)	0.0022(14)	0.0004(15)	-0.0025(15)
Volume [Å3]	1447.91(3)					C(11)	0.4109(7)	0.1758(3)	0.30970(14)	0.0317(8)		C(11)	0.0350(19)	0.0358(18)	0.0237(17)	-0.0016(14)	0.0007(15)	-0.0055(16)
Z	4					C(12)	0.6049(7)	0.1111(4)	0.29100(16)	0.0417(9)		C(12)	0.041(2)	0.054(2)	0.0294(19)	0.0074(18)	0.0009(16)	0.004(2)
Temperature [K]	169.99(10)					C(13)	0.7285(9)	0.1557(5)	0.24791(17)	0.0484(11)		C(13)	0.037(2)	0.082(3)	0.027(2)	0.0057(18)	0.0050(17)	0.0010(19)
Diffraction Device	XtaLAB Synergy, Dualflex, HyPix					C(14)	0.6578(9)	0.2649(5)	0.22324(16)	0.0501(11)		C(14)	0.057(3)	0.069(3)	0.0248(18)	0.0068(19)	0.0068(18)	-0.024(2)
Radiation Type	1.54184 Å ( Cu K/ micro-focus sealed X-ray tube)					C(15)	0.4624(10)	0.3287(4)	0.24024(18)	0.0509(12)		C(15)	0.077(4)	0.039(2)	0.034(2)	0.0066(18)	-0.003(2)	-0.013(2)
F(000)	840					C(16)	0.3379(8)	0.2854(4)	0.28321(16)	0.0400(9)		C(16)	0.057(2)	0.033(2)	0.0289(17)	0.0000(15)	0.0004(17)	-0.0045(18)
Absorption coefficient [mm-1 ]	20.56					Br(1)	1.16928(6)	0.07117(3)	0.58085(2)	0.02889(12)		Br(1)	0.0323(2)	0.0286(2)	0.02626(19)	-0.00029(13)	0.00495(14)	0.00382(14)
Absorption correction	Gaussian					H(2)	0.912225	0.271212	0.618447	0.037
Measurement range	3.6 - 66.5					H(3)	0.759618	0.427343	0.673175	0.042
Index range	-6 < h < 6					H(4)	0.409817	0.537559	0.64076	0.043
	-12 < k < 12					H(5)	0.206152	0.496425	0.55473	0.037
	-27 < l < 28					H(10A)	0.10601	0.105035	0.342039	0.039
Measured reflexes	13403					H(10B)	0.357734	0.048954	0.370167	0.039
Independent	2560					H(12)	0.653971	0.035359	0.307856	0.05
Observed	2434					H(13)	0.861505	0.110802	0.235583	0.058
R(int)	0.055					H(14)	0.744204	0.296405	0.194341	0.06
Completeness (%) / theta (°)	100.0 / 66.482					H(15)	0.41213	0.403258	0.222412	0.061
Transmission (min / max)	0.186 / 0.589					H(16)	0.202882	0.330175	0.29467	0.048
R1 (observed/all)	0.0267 / 0.0286
wR2 (observed/all)	0.0725 / 0.0738
GooF = S	1.048
Rest electron density max./min. [e-/Å³]	-0.808 / 0.754
